# Supplementary material for: Mechanical Stimulation Activates Postn-Mediated Wnt/β-catenin Pathway to Enhance BMSCs Paracrine Function and Promote Wound Healing in Diabetic Rats
Source: Research Square preprint supplement (doi:10.21203/rs.3.rs-8064472/v1), 2026-01-19
Supplement: Supplementary file 1 [file 91099e60ad40715595de4ef1.docx]

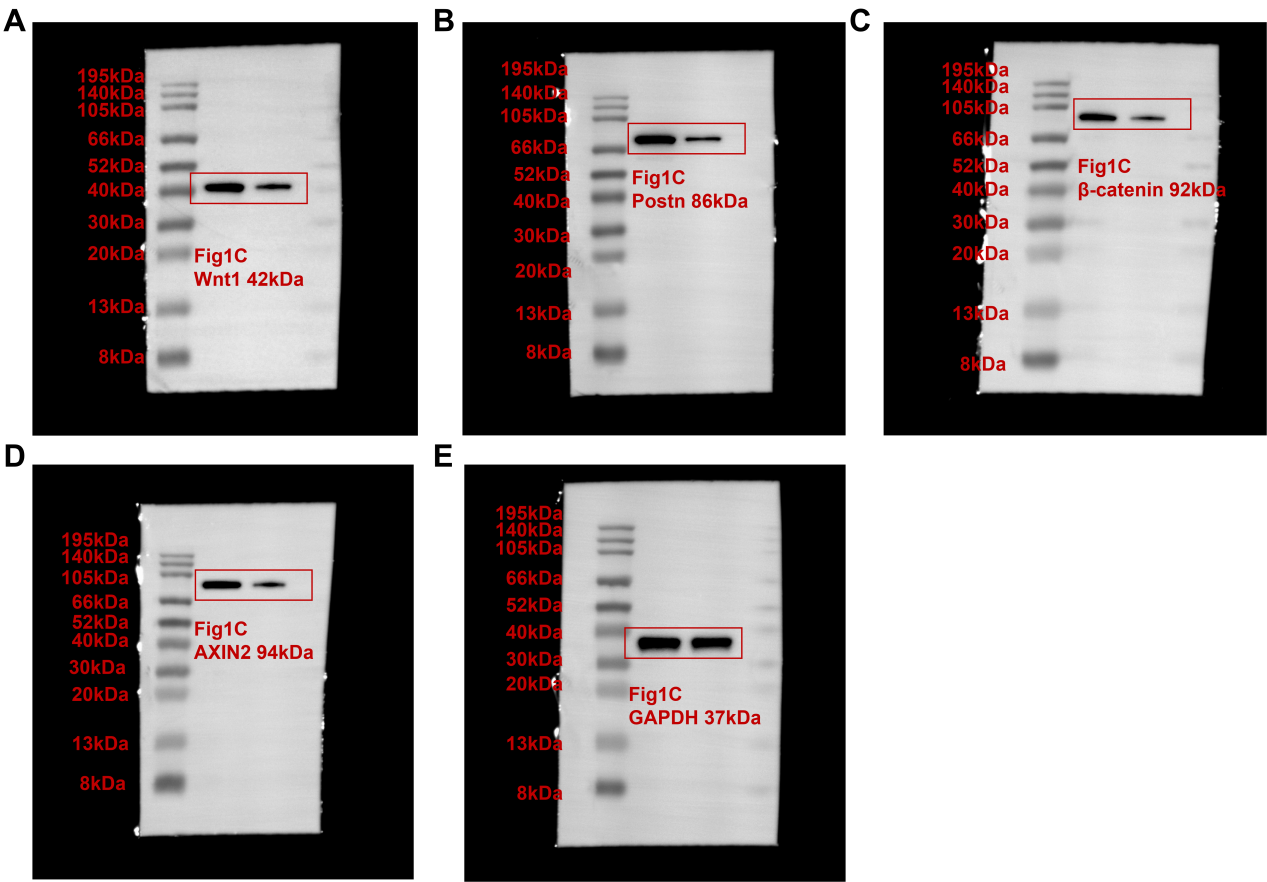


Supplementary Figure 1. Original uncropped Western blot images corresponding to Figure 1C. The full-length, uncropped Western blot membranes are presented for each target protein shown in Figure 1C, including Wnt1 (42 kDa), Postn (86 kDa), β-catenin (92 kDa), AXIN2 (94 kDa), and the internal control GAPDH (37 kDa). Red boxes indicate the regions used in the main figure. All blots were processed under identical exposure settings.


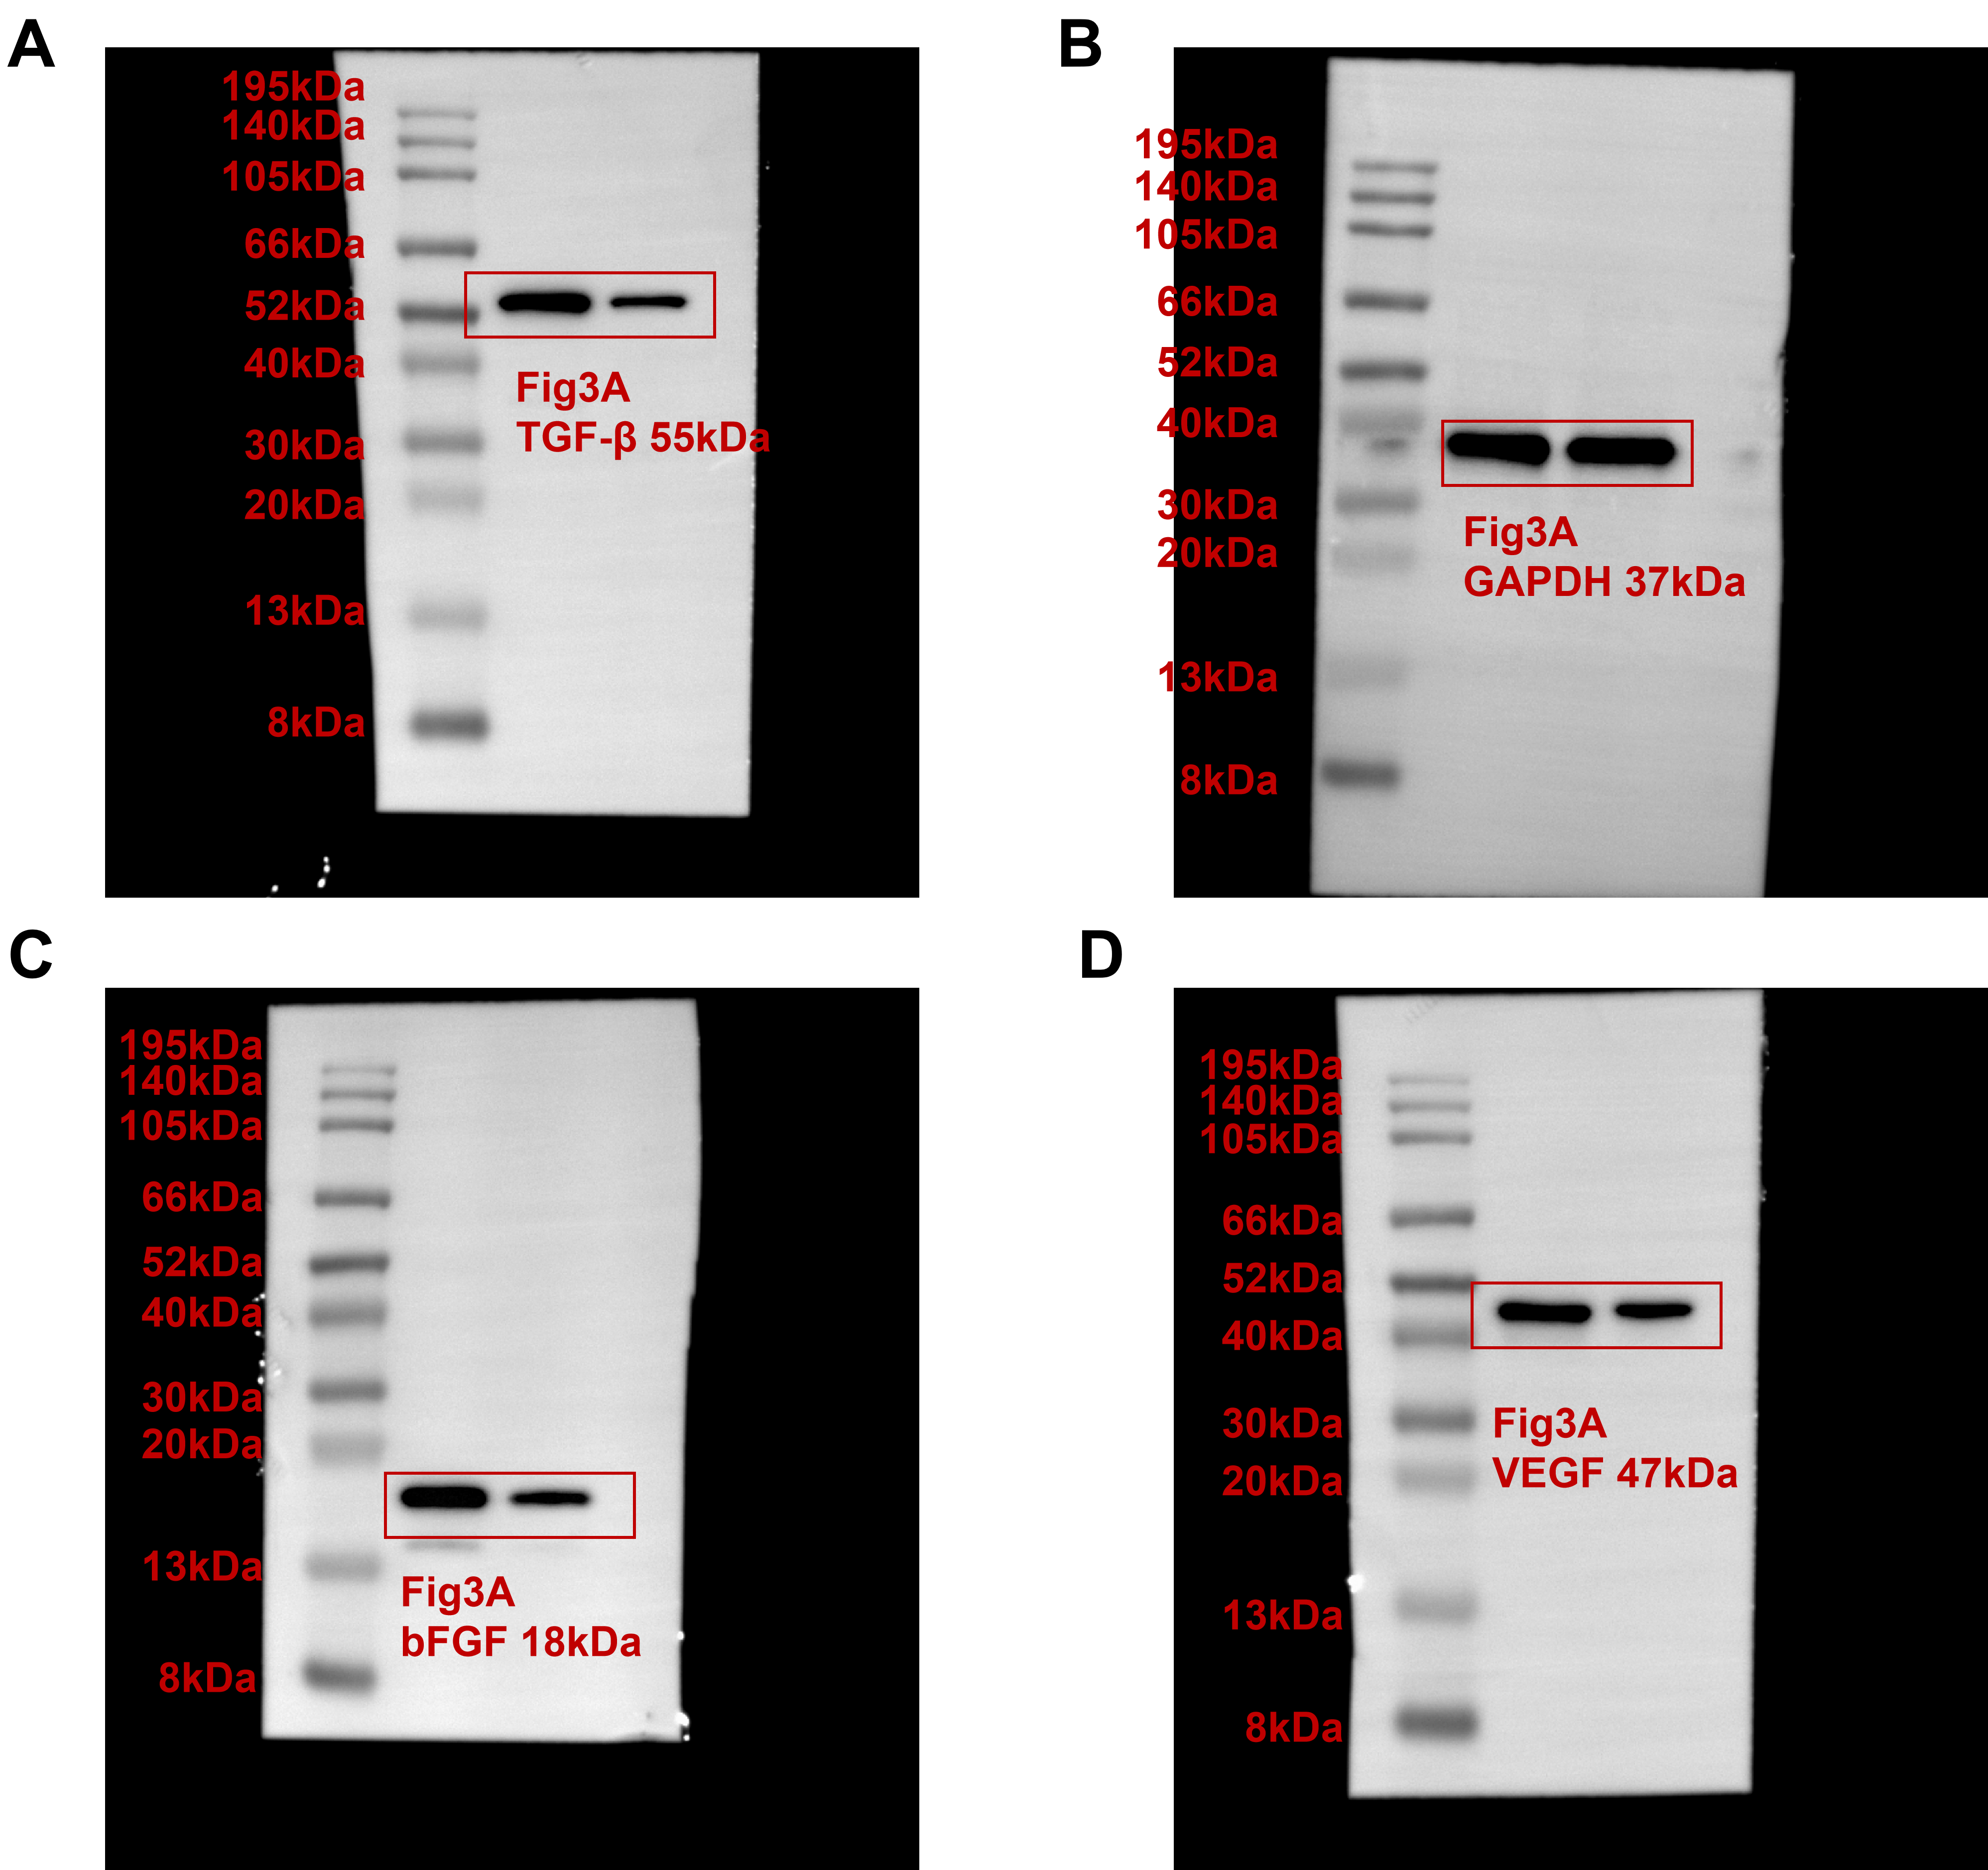


Supplementary Figure 2. Original uncropped Western blot images corresponding to Figure 3A. The full-length, uncropped Western blot membranes are presented for each target protein shown in Figure 3A, including TGF-β (55 kDa), bFGF (18 kDa), VEGF (47 kDa) and the internal control GAPDH (37 kDa). Red boxes indicate the regions used in the main figure. All blots were processed under identical exposure settings.


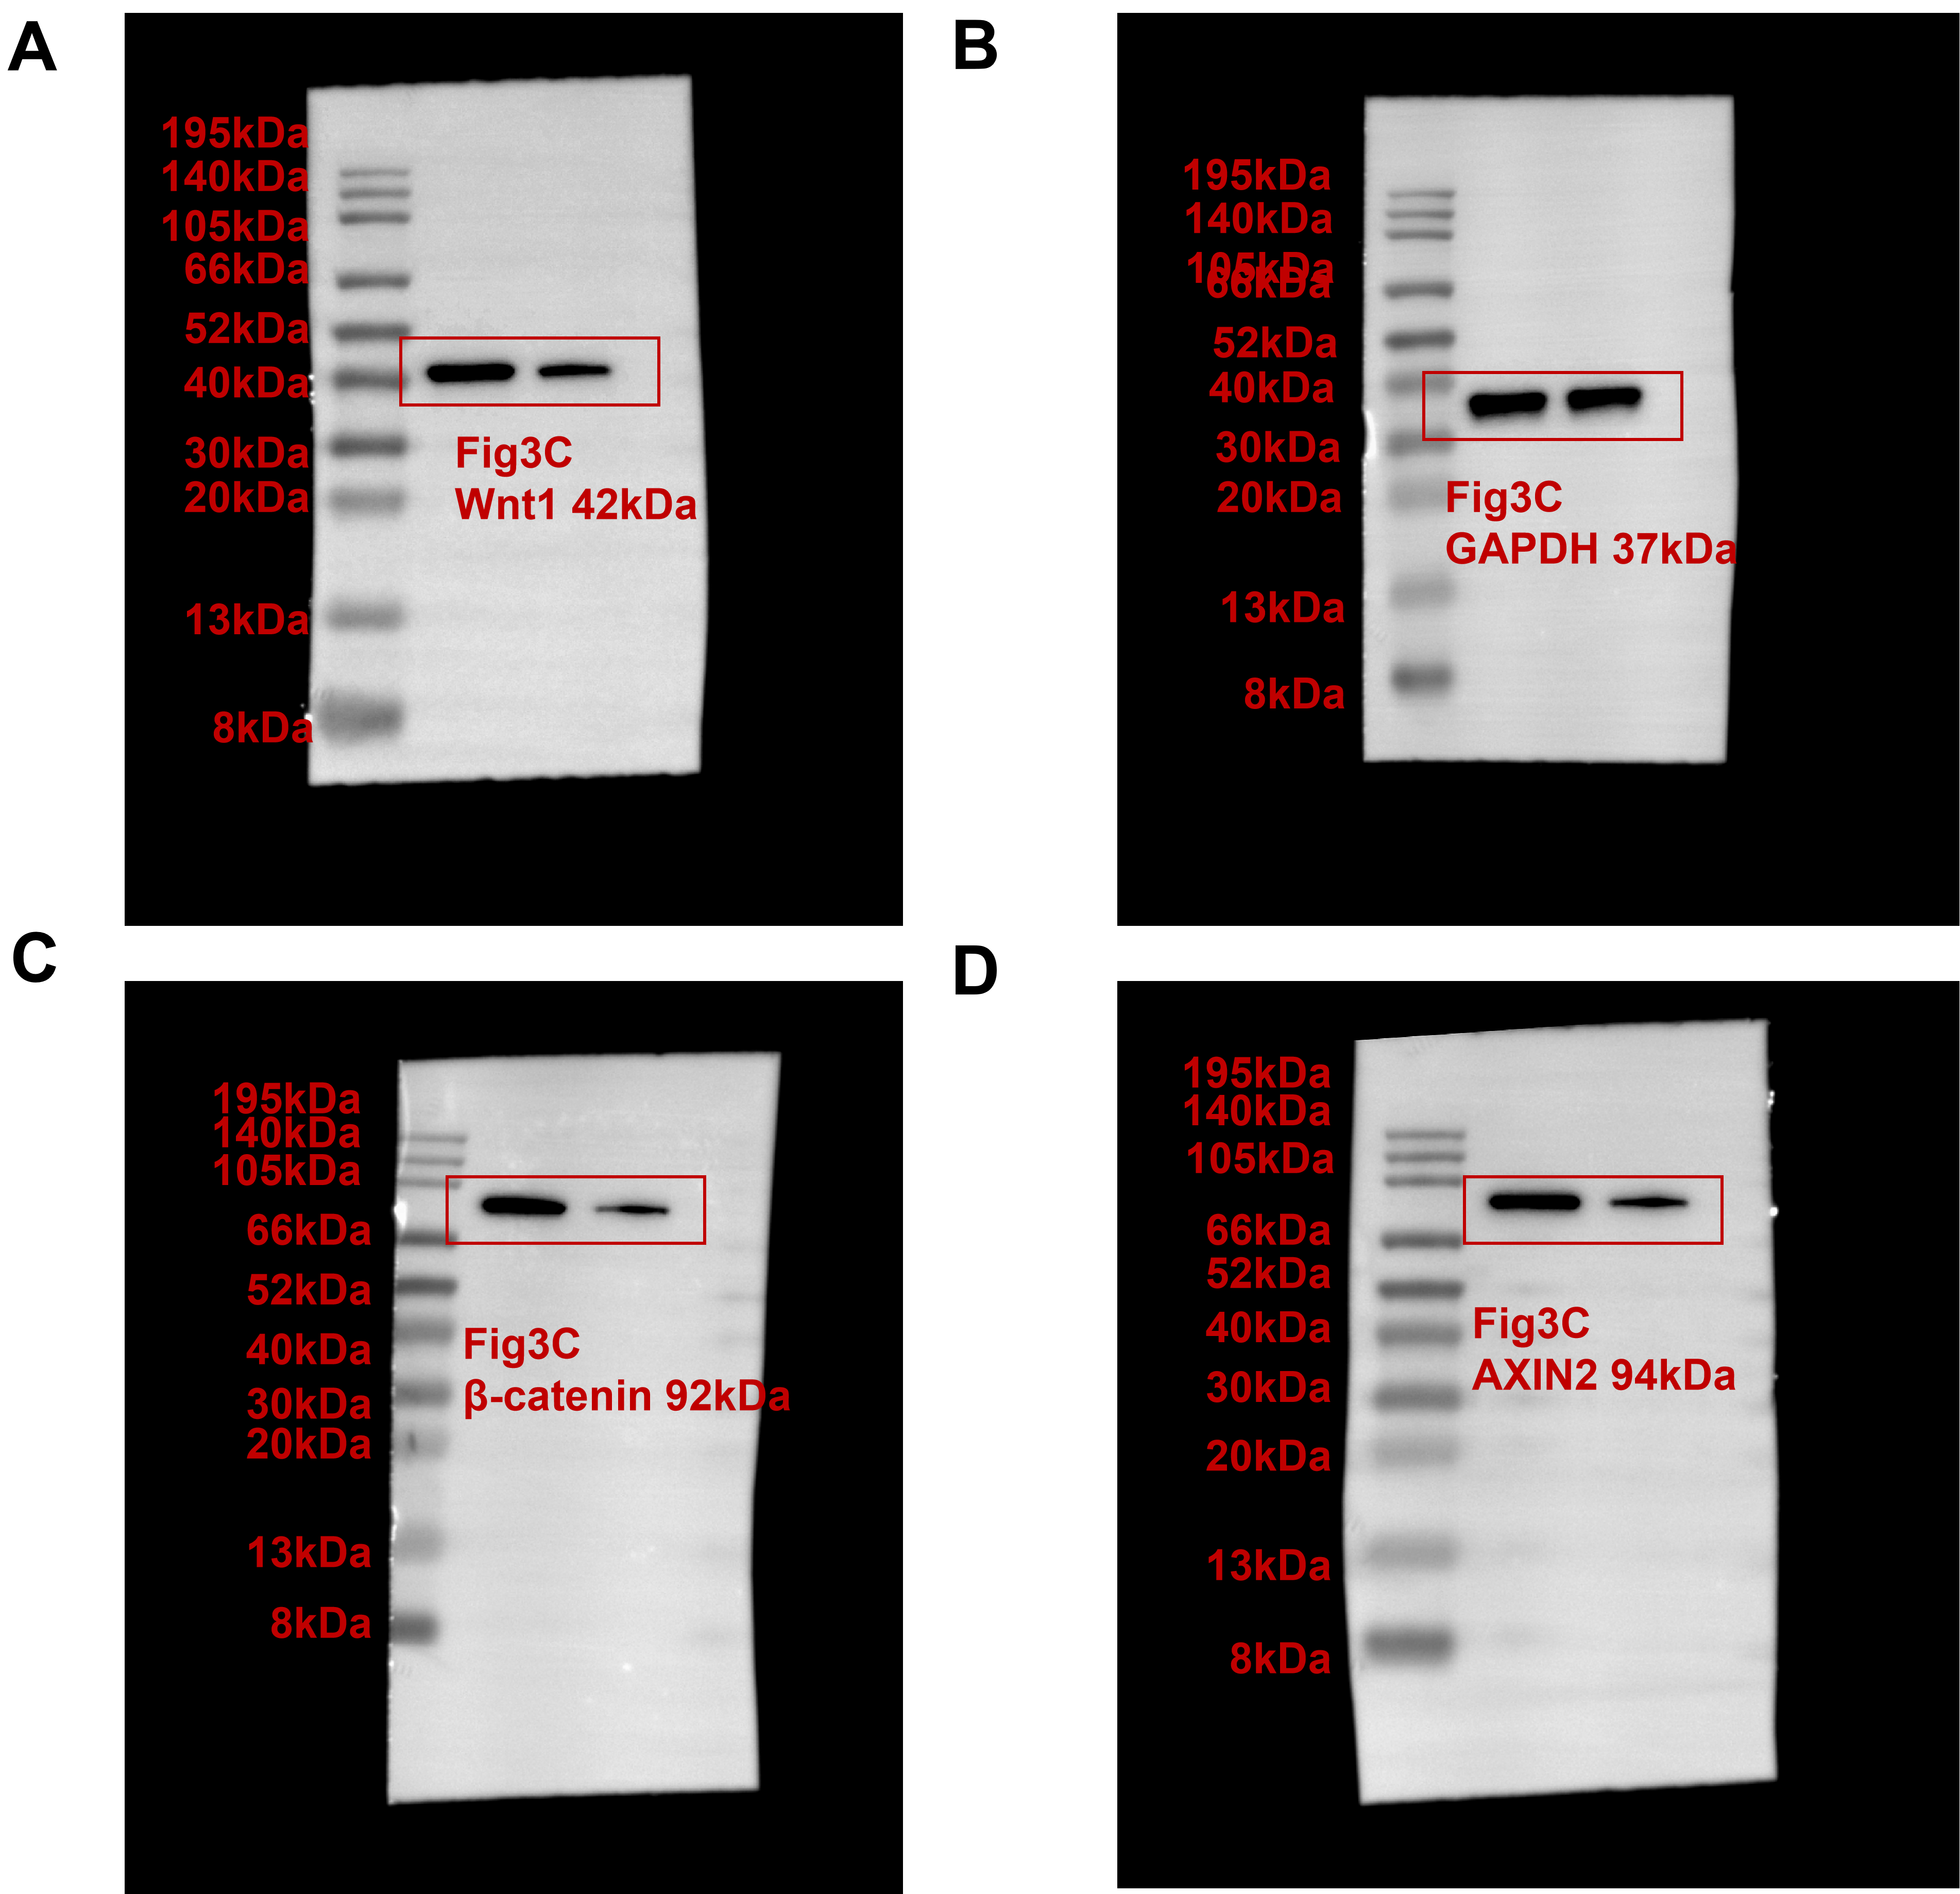


Supplementary Figure 3. Original uncropped Western blot images corresponding to Figure 1C. The full-length, uncropped Western blot membranes are presented for each target protein shown in Figure 3C, including Wnt1 (42 kDa), β-catenin (92 kDa), AXIN2 (94 kDa), and the internal control GAPDH (37 kDa). Red boxes indicate the regions used in the main figure. All blots were processed under identical exposure settings.


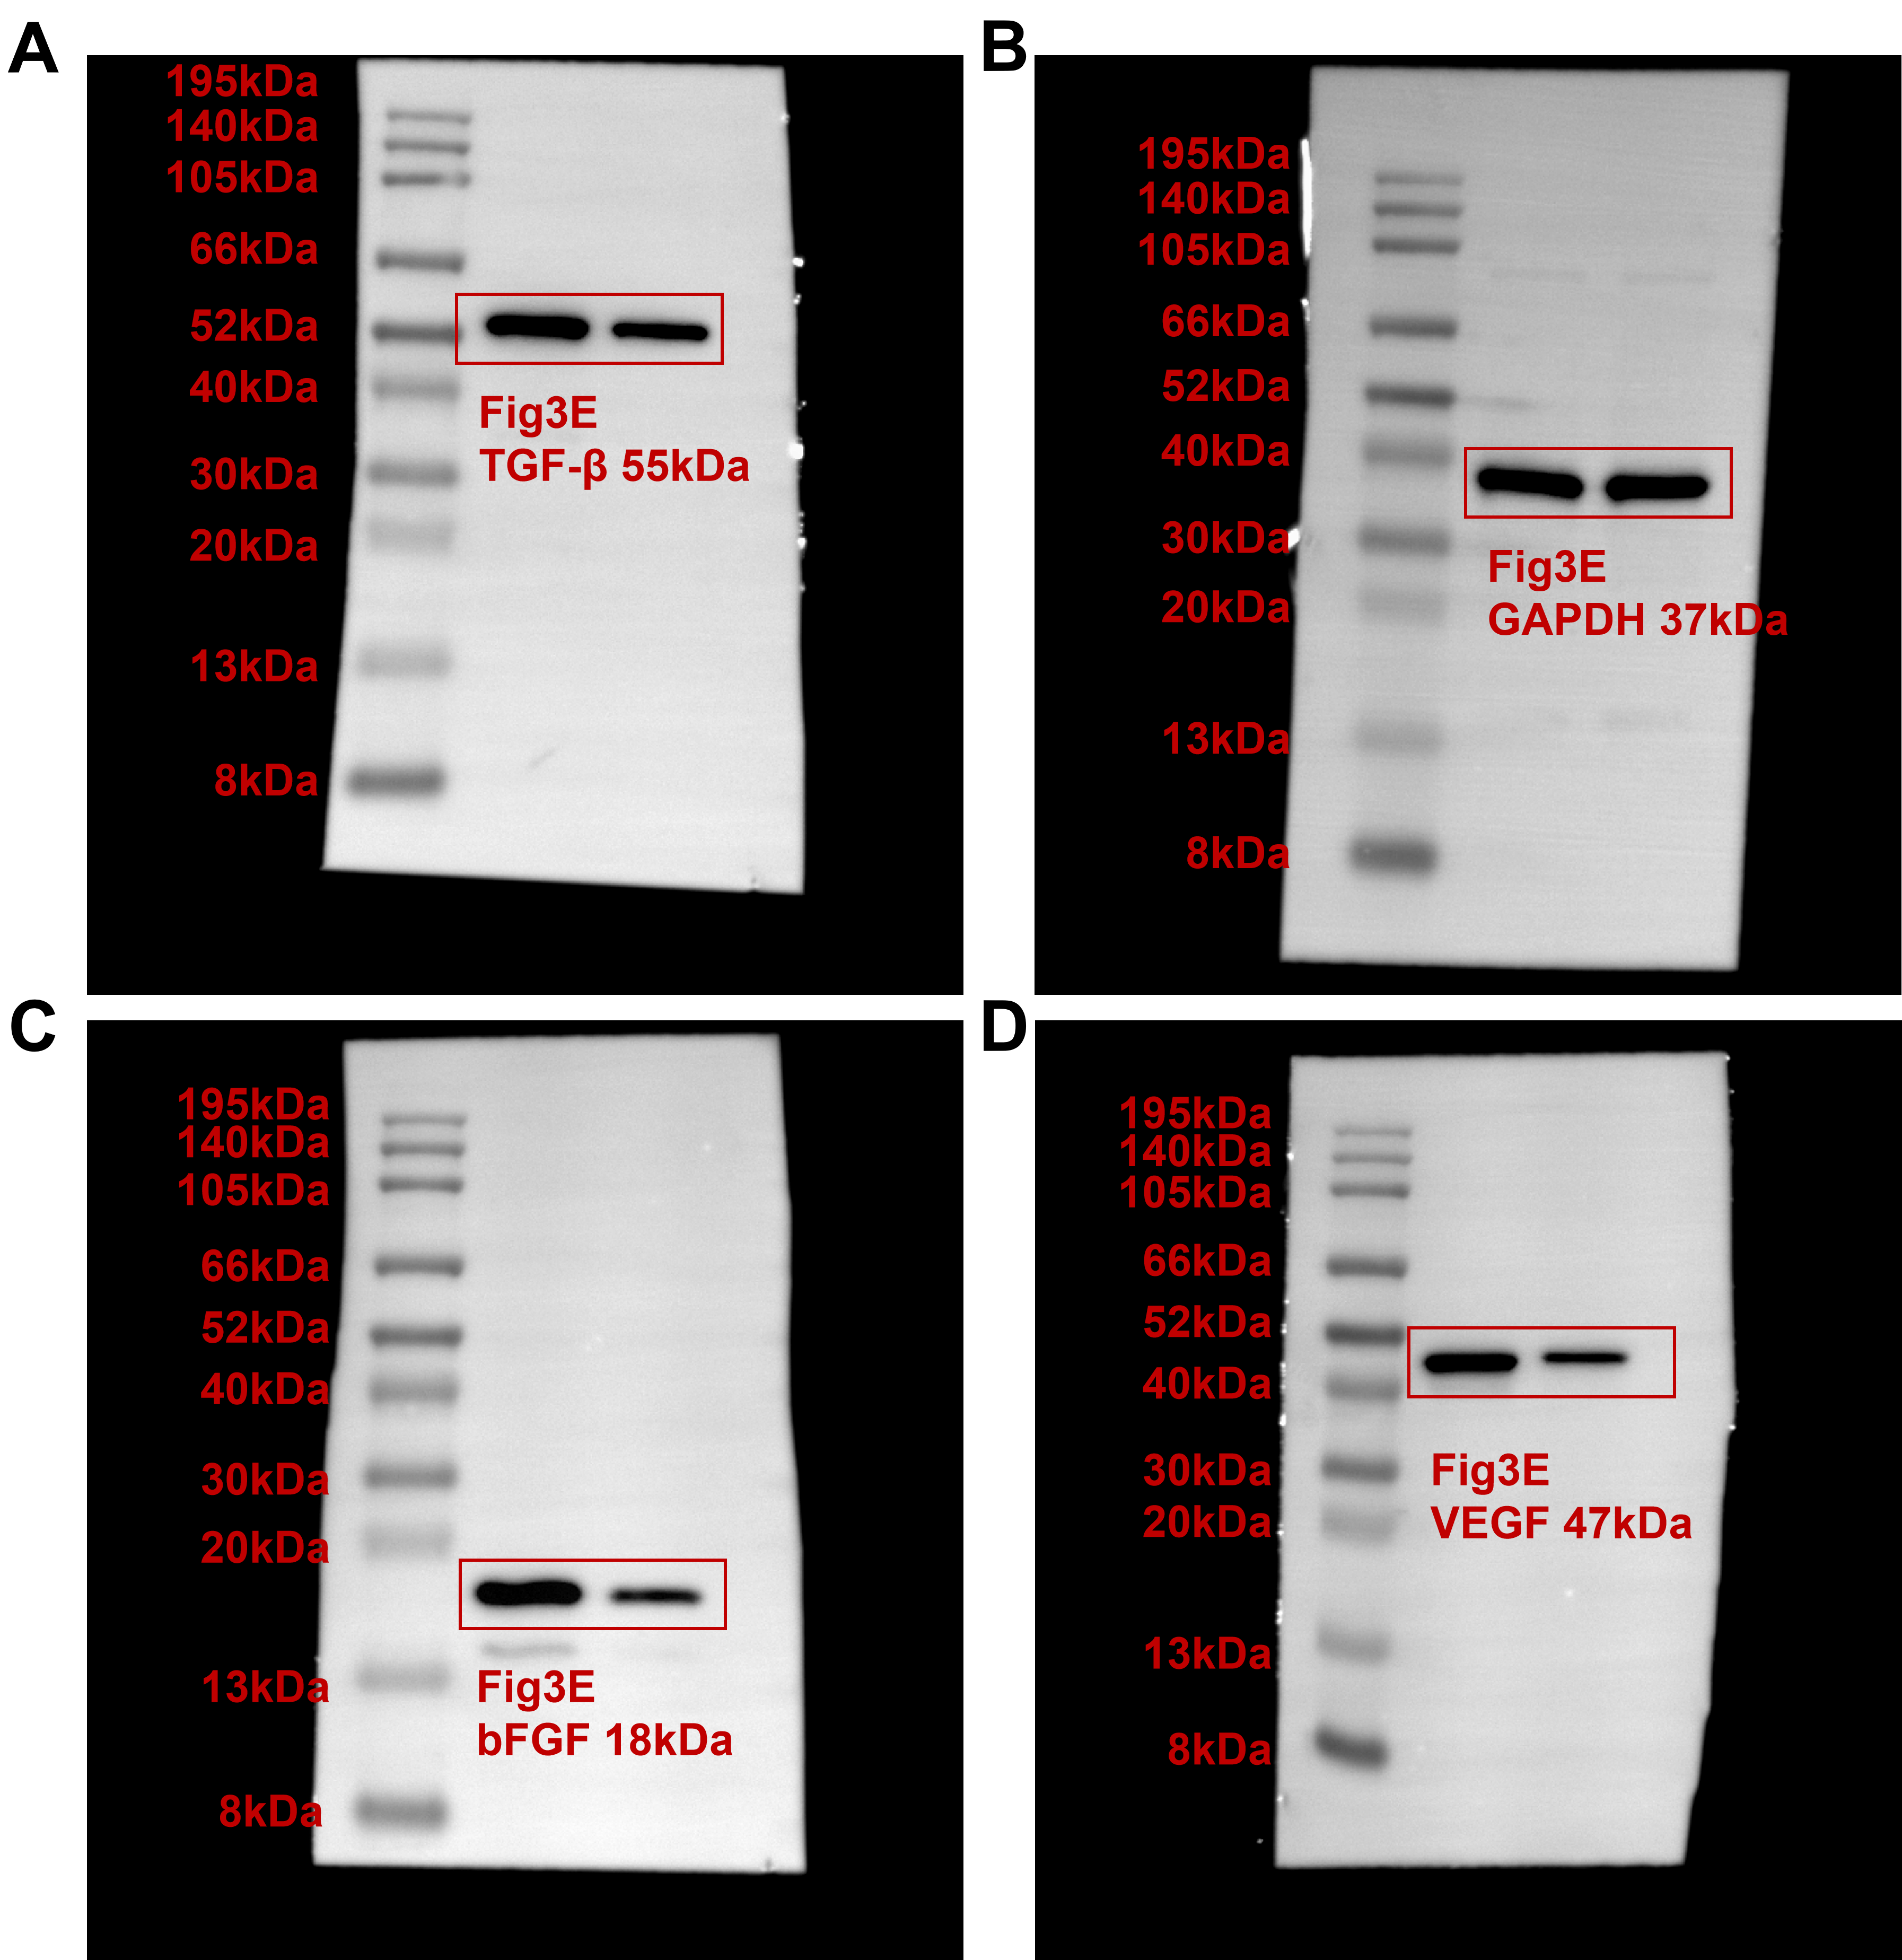


Supplementary Figure 4. Original uncropped Western blot images corresponding to Figure 3E. The full-length, uncropped Western blot membranes are presented for each target protein shown in Figure 3E, including TGF-β (55 kDa), bFGF (18 kDa), VEGF (47 kDa) and the internal control GAPDH (37 kDa). Red boxes indicate the regions used in the main figure. All blots were processed under identical exposure settings.


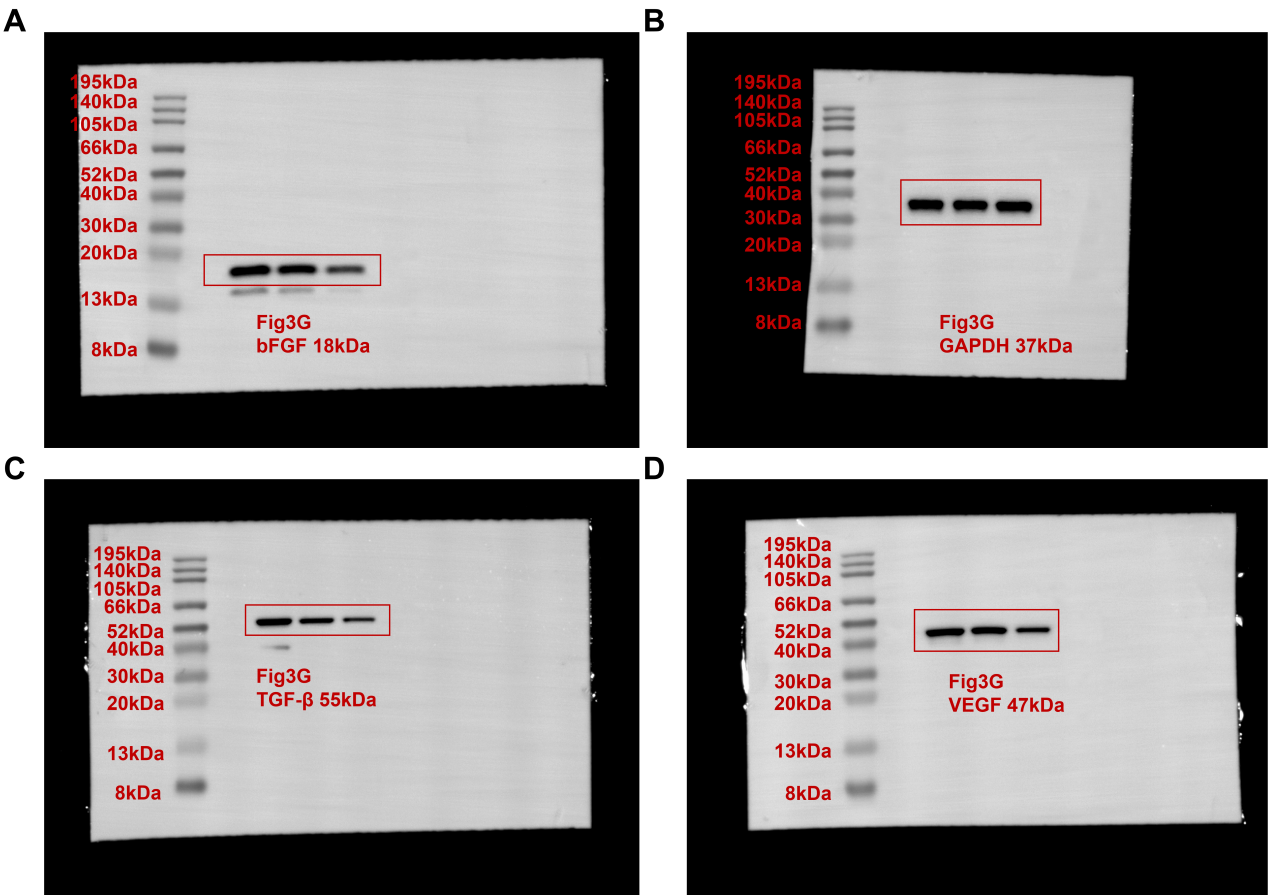


Supplementary Figure 5. Original uncropped Western blot images corresponding to Figure 3G. The full-length, uncropped Western blot membranes are presented for each target protein shown in Figure 3G, including TGF-β (55 kDa), bFGF (18 kDa), VEGF (47 kDa) and the internal control GAPDH (37 kDa). Red boxes indicate the regions used in the main figure. All blots were processed under identical exposure settings.


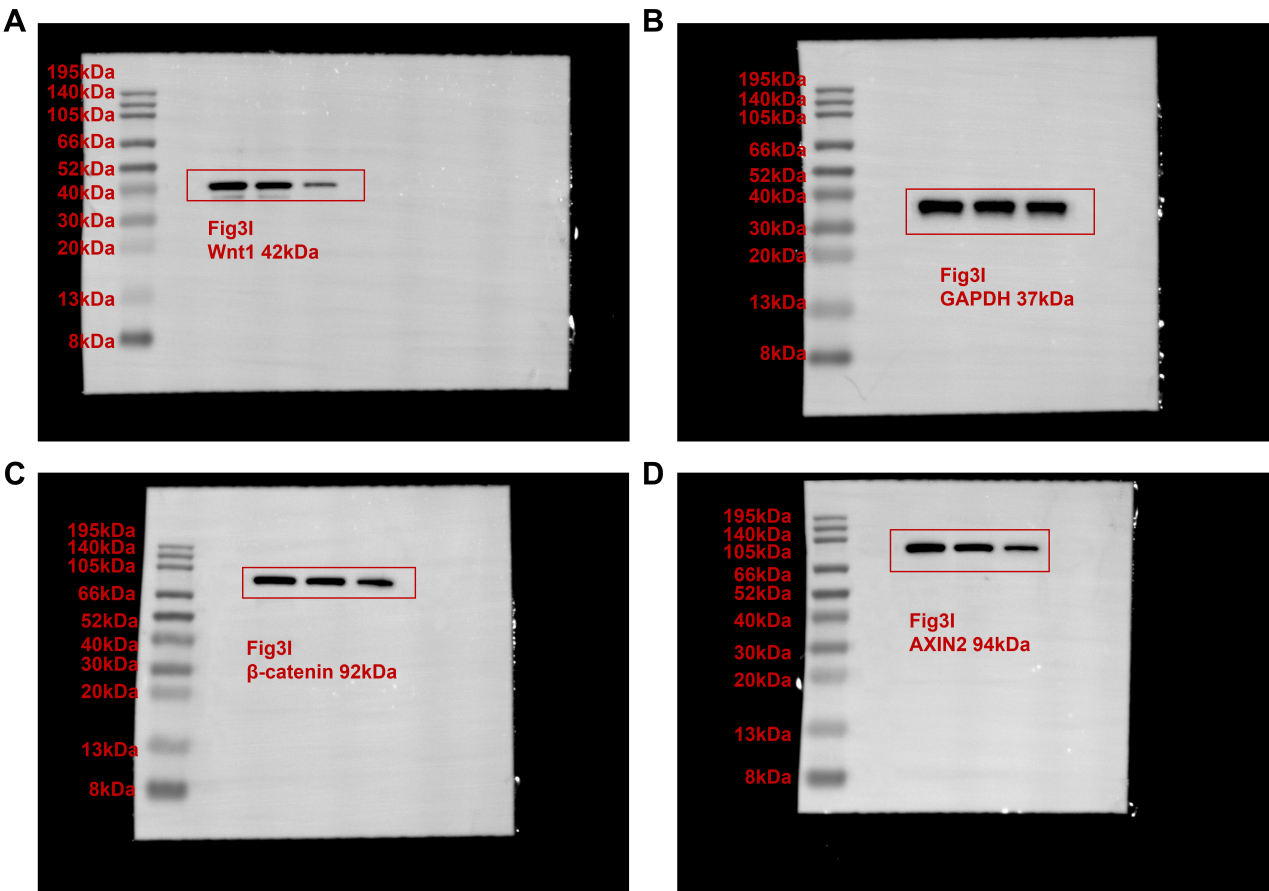


Supplementary Figure 6. Original uncropped Western blot images corresponding to Figure 3I. The full-length, uncropped Western blot membranes are presented for each target protein shown in Figure 3I, including Wnt1 (42 kDa), β-catenin (92 kDa), AXIN2 (94 kDa), and the internal control GAPDH (37 kDa). Red boxes indicate the regions used in the main figure. All blots were processed under identical exposure settings.
